# Supplementary material for: Influence of N-heteroaromatic π–π stacking on supramolecular assembly and coordination geometry; effect of a single-atom change in the ligand
Source: Royal Society of Chemistry journal article supplement (doi:10.1039/c4dt03518f), 2015-01-01
Supplement: c4dt03518f1.pdf [file c4dt03518f1.pdf]

# Influence of *N*-heteroaromatic $\pi \dots \pi$ stacking on supramolecular assembly and coordination geometry; Effect of single-atom ligand change

Hamid Reza Khavasi\* and Bahareh Mir Mohammad Sadegh

*Faculty of Chemistry, Shahid Beheshti University, General Campus, Evin, Tehran 1983963113, Iran.*

*E-mail: [h-khavasi@sbu.ac.ir](mailto:h-khavasi@sbu.ac.ir)*

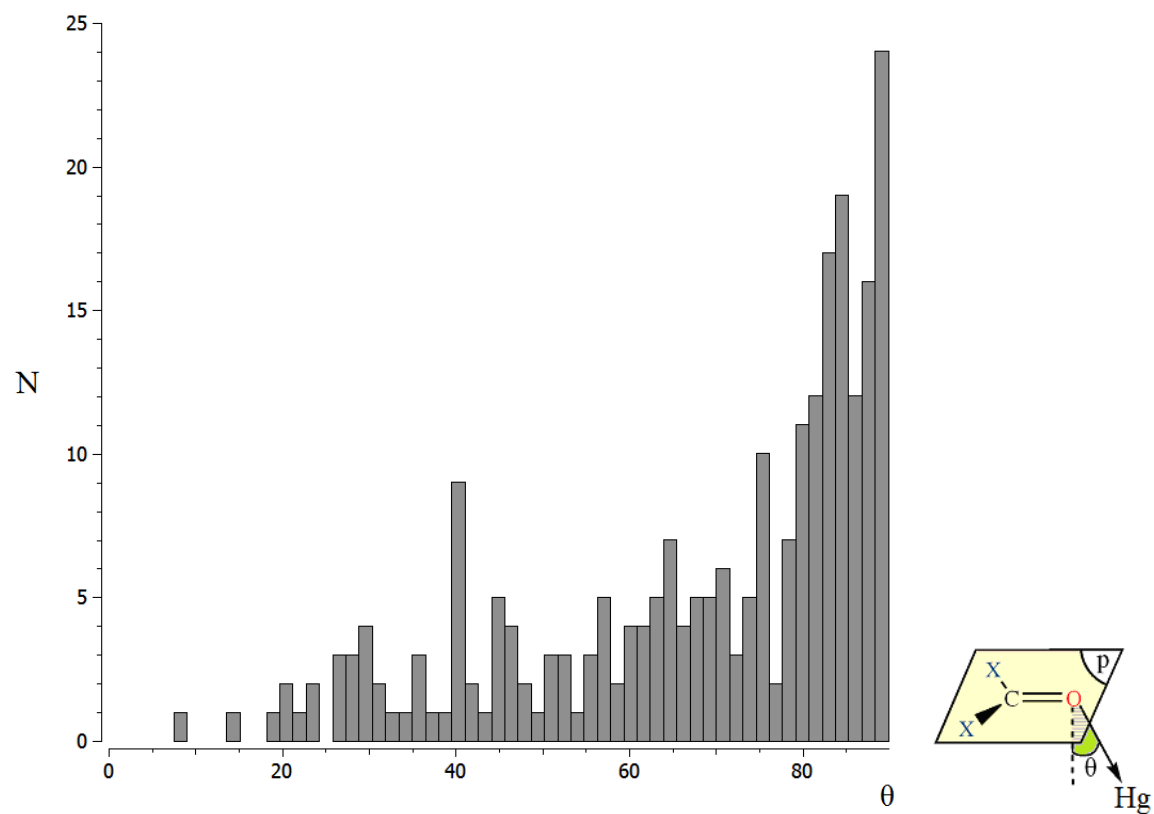

**Figure S1.** Histogram for the angle ( $\theta$ , °) between the plane (containing  $(X)_2C=O$  moiety) normal and Hg-O vector from a CSD search without any filtrations. X stands for any atom.
